# Supplementary material
Source: ML conference proceedings conference paper supplement (https://proceedings.neurips.cc/paper_files/paper/2021/hash/76f1cfd7754a6e4fc3281bcccb3d0902-Abstract.html)
Supplement: Supplementary file 1 [file 76f1cfd7754a6e4fc3281bcccb3d0902-Supplemental.zip]

Archive with 901 entries (794 files):
- supplementary-materials/
- supplementary-materials/.DS_Store
- __MACOSX/supplementary-materials/._.DS_Store
- supplementary-materials/BernNet-master/
- __MACOSX/supplementary-materials/._BernNet-master
- supplementary-materials/BernNet-full.pdf
- __MACOSX/supplementary-materials/._BernNet-full.pdf
- supplementary-materials/BernNet-master/.DS_Store
- __MACOSX/supplementary-materials/BernNet-master/._.DS_Store
- supplementary-materials/BernNet-master/README.md
- __MACOSX/supplementary-materials/BernNet-master/._README.md
- supplementary-materials/BernNet-master/NodeClassification/
- supplementary-materials/BernNet-master/LearningFilters/
- supplementary-materials/BernNet-master/NodeClassification/.DS_Store
- supplementary-materials/BernNet-master/NodeClassification/models.py
- supplementary-materials/BernNet-master/NodeClassification/dataset_loader.py
- supplementary-materials/BernNet-master/NodeClassification/utils.py
- supplementary-materials/BernNet-master/NodeClassification/bernnet.sh
- supplementary-materials/BernNet-master/NodeClassification/Bernpro.py
- supplementary-materials/BernNet-master/NodeClassification/data/
- supplementary-materials/BernNet-master/NodeClassification/training.py
- supplementary-materials/BernNet-master/LearningFilters/Bern.py
- __MACOSX/supplementary-materials/BernNet-master/LearningFilters/._Bern.py
- supplementary-materials/BernNet-master/LearningFilters/.DS_Store
- supplementary-materials/BernNet-master/LearningFilters/models.py
- supplementary-materials/BernNet-master/LearningFilters/preprocessing.m
- supplementary-materials/BernNet-master/LearningFilters/image/
- supplementary-materials/BernNet-master/LearningFilters/utils.py
- supplementary-materials/BernNet-master/LearningFilters/gspbox/
- supplementary-materials/BernNet-master/LearningFilters/bernnet.sh
- supplementary-materials/BernNet-master/LearningFilters/data/
- supplementary-materials/BernNet-master/LearningFilters/training.py
- supplementary-materials/BernNet-master/NodeClassification/data/cornell/
- supplementary-materials/BernNet-master/NodeClassification/data/computers/
- supplementary-materials/BernNet-master/NodeClassification/data/.DS_Store
- supplementary-materials/BernNet-master/NodeClassification/data/film/
- supplementary-materials/BernNet-master/NodeClassification/data/chameleon/
- supplementary-materials/BernNet-master/NodeClassification/data/citeseer/
- supplementary-materials/BernNet-master/NodeClassification/data/cora/
- supplementary-materials/BernNet-master/NodeClassification/data/texas/
- supplementary-materials/BernNet-master/NodeClassification/data/pubmed/
- supplementary-materials/BernNet-master/NodeClassification/data/squirrel/
- supplementary-materials/BernNet-master/NodeClassification/data/photo/
- supplementary-materials/BernNet-master/LearningFilters/image/img22.jpg
- supplementary-materials/BernNet-master/LearningFilters/image/img36.jpg
- supplementary-materials/BernNet-master/LearningFilters/image/img37.jpg
- supplementary-materials/BernNet-master/LearningFilters/image/img23.jpg
- supplementary-materials/BernNet-master/LearningFilters/image/img35.jpg
- supplementary-materials/BernNet-master/LearningFilters/image/img21.jpg
- supplementary-materials/BernNet-master/LearningFilters/image/img20.jpg
- supplementary-materials/BernNet-master/LearningFilters/image/img34.jpg
- supplementary-materials/BernNet-master/LearningFilters/image/img30.jpg
- supplementary-materials/BernNet-master/LearningFilters/image/img24.jpg
- supplementary-materials/BernNet-master/LearningFilters/image/img18.jpg
- supplementary-materials/BernNet-master/LearningFilters/image/.DS_Store
- supplementary-materials/BernNet-master/LearningFilters/image/img19.jpg
- supplementary-materials/BernNet-master/LearningFilters/image/img25.jpg
- supplementary-materials/BernNet-master/LearningFilters/image/img31.jpg
- supplementary-materials/BernNet-master/LearningFilters/image/img27.jpg
- supplementary-materials/BernNet-master/LearningFilters/image/img33.jpg
- supplementary-materials/BernNet-master/LearningFilters/image/img32.jpg
- supplementary-materials/BernNet-master/LearningFilters/image/img26.jpg
- supplementary-materials/BernNet-master/LearningFilters/image/img41.jpg
- supplementary-materials/BernNet-master/LearningFilters/image/img40.jpg
- supplementary-materials/BernNet-master/LearningFilters/image/img42.jpg
- supplementary-materials/BernNet-master/LearningFilters/image/img43.jpg
- supplementary-materials/BernNet-master/LearningFilters/image/img47.jpg
- supplementary-materials/BernNet-master/LearningFilters/image/img46.jpg
- supplementary-materials/BernNet-master/LearningFilters/image/img44.jpg
- supplementary-materials/BernNet-master/LearningFilters/image/img50.jpg
- supplementary-materials/BernNet-master/LearningFilters/image/img9.jpg
- supplementary-materials/BernNet-master/LearningFilters/image/img8.jpg
- supplementary-materials/BernNet-master/LearningFilters/image/img45.jpg
- supplementary-materials/BernNet-master/LearningFilters/image/img48.jpg
- supplementary-materials/BernNet-master/LearningFilters/image/img5.jpg
- supplementary-materials/BernNet-master/LearningFilters/image/img4.jpg
- supplementary-materials/BernNet-master/LearningFilters/image/img49.jpg
- supplementary-materials/BernNet-master/LearningFilters/image/img6.jpg
- supplementary-materials/BernNet-master/LearningFilters/image/img7.jpg
- supplementary-materials/BernNet-master/LearningFilters/image/img3.jpg
- supplementary-materials/BernNet-master/LearningFilters/image/img2.jpg
- supplementary-materials/BernNet-master/LearningFilters/image/img1.jpg
- supplementary-materials/BernNet-master/LearningFilters/image/img17.jpg
- supplementary-materials/BernNet-master/LearningFilters/image/img16.jpg
- supplementary-materials/BernNet-master/LearningFilters/image/img28.jpg
- supplementary-materials/BernNet-master/LearningFilters/image/img14.jpg
- supplementary-materials/BernNet-master/LearningFilters/image/img15.jpg
- supplementary-materials/BernNet-master/LearningFilters/image/img29.jpg
- supplementary-materials/BernNet-master/LearningFilters/image/img11.jpg
- supplementary-materials/BernNet-master/LearningFilters/image/img39.jpg
- supplementary-materials/BernNet-master/LearningFilters/image/img38.jpg
- supplementary-materials/BernNet-master/LearningFilters/image/img10.jpg
- supplementary-materials/BernNet-master/LearningFilters/image/img12.jpg
- supplementary-materials/BernNet-master/LearningFilters/image/img13.jpg
- supplementary-materials/BernNet-master/LearningFilters/gspbox/prox/
- supplementary-materials/BernNet-master/LearningFilters/gspbox/filters/
- supplementary-materials/BernNet-master/LearningFilters/gspbox/LICENSE
- supplementary-materials/BernNet-master/LearningFilters/gspbox/gspbox_version
- supplementary-materials/BernNet-master/LearningFilters/gspbox/operators/
- supplementary-materials/BernNet-master/LearningFilters/gspbox/gsp_start.m
- supplementary-materials/BernNet-master/LearningFilters/gspbox/Contents.m
- supplementary-materials/BernNet-master/LearningFilters/gspbox/sgwt_require/
- supplementary-materials/BernNet-master/LearningFilters/gspbox/graph_ml/
- supplementary-materials/BernNet-master/LearningFilters/gspbox/embedding/
- supplementary-materials/BernNet-master/LearningFilters/gspbox/learn_graph/
- supplementary-materials/BernNet-master/LearningFilters/gspbox/utils/
- supplementary-materials/BernNet-master/LearningFilters/gspbox/imageprocessing/
- supplementary-materials/BernNet-master/LearningFilters/gspbox/README.md
- supplementary-materials/BernNet-master/LearningFilters/gspbox/pointsclouds/
- supplementary-materials/BernNet-master/LearningFilters/gspbox/gsp_install_unlocbox.m
- supplementary-materials/BernNet-master/LearningFilters/gspbox/plotting/
- supplementary-materials/BernNet-master/LearningFilters/gspbox/stationarity/
- supplementary-materials/BernNet-master/LearningFilters/gspbox/graphs/
- supplementary-materials/BernNet-master/LearningFilters/gspbox/3rdparty/
- supplementary-materials/BernNet-master/LearningFilters/gspbox/gsp_install.m
- supplementary-materials/BernNet-master/LearningFilters/gspbox/gsp_make.m
- supplementary-materials/BernNet-master/LearningFilters/gspbox/demos/
- supplementary-materials/BernNet-master/LearningFilters/data/.DS_Store
- supplementary-materials/BernNet-master/LearningFilters/data/2Dgrid/
- supplementary-materials/BernNet-master/NodeClassification/data/cornell/.DS_Store
- supplementary-materials/BernNet-master/NodeClassification/data/cornell/raw/
- supplementary-materials/BernNet-master/NodeClassification/data/computers/Computers/
- supplementary-materials/BernNet-master/NodeClassification/data/computers/.DS_Store
- supplementary-materials/BernNet-master/NodeClassification/data/film/.DS_Store
- supplementary-materials/BernNet-master/NodeClassification/data/film/raw/
- supplementary-materials/BernNet-master/NodeClassification/data/chameleon/.DS_Store
- supplementary-materials/BernNet-master/NodeClassification/data/chameleon/raw/
- supplementary-materials/BernNet-master/NodeClassification/data/citeseer/.DS_Store
- supplementary-materials/BernNet-master/NodeClassification/data/citeseer/citeseer/
- supplementary-materials/BernNet-master/NodeClassification/data/cora/.DS_Store
- supplementary-materials/BernNet-master/NodeClassification/data/cora/cora/
- supplementary-materials/BernNet-master/NodeClassification/data/texas/.DS_Store
- supplementary-materials/BernNet-master/NodeClassification/data/texas/raw/
- supplementary-materials/BernNet-master/NodeClassification/data/pubmed/.DS_Store
- supplementary-materials/BernNet-master/NodeClassification/data/pubmed/pubmed/
- supplementary-materials/BernNet-master/NodeClassification/data/squirrel/.DS_Store
- supplementary-materials/BernNet-master/NodeClassification/data/squirrel/raw/
- supplementary-materials/BernNet-master/NodeClassification/data/photo/.DS_Store
- supplementary-materials/BernNet-master/NodeClassification/data/photo/Photo/
- supplementary-materials/BernNet-master/LearningFilters/gspbox/prox/gsp_prox_tv.m
- supplementary-materials/BernNet-master/LearningFilters/gspbox/prox/gsp_solve_l0.m
- supplementary-materials/BernNet-master/LearningFilters/gspbox/prox/gsp_prox_l1_filterbank.m
- supplementary-materials/BernNet-master/LearningFilters/gspbox/prox/Contents.m
- supplementary-materials/BernNet-master/LearningFilters/gspbox/prox/gsp_prox_l2_filterbank.m
- supplementary-materials/BernNet-master/LearningFilters/gspbox/prox/gsp_prox_tik.m
- supplementary-materials/BernNet-master/LearningFilters/gspbox/prox/gsp_proj_filterbank.m
- supplementary-materials/BernNet-master/LearningFilters/gspbox/prox/gsp_proj_b2_filterbank.m
- supplementary-materials/BernNet-master/LearningFilters/gspbox/prox/gsp_solve_l1.m
- supplementary-materials/BernNet-master/LearningFilters/gspbox/prox/gsp_wavelet_dn.m
- supplementary-materials/BernNet-master/LearningFilters/gspbox/filters/gsp_jtv_mat2vec.m
- supplementary-materials/BernNet-master/LearningFilters/gspbox/filters/gsp_jtv_design_kleingordon.m
- supplementary-materials/BernNet-master/LearningFilters/gspbox/filters/gsp_design_held.m
- supplementary-materials/BernNet-master/LearningFilters/gspbox/filters/gsp_jtv_vec2mat.m
- supplementary-materials/BernNet-master/LearningFilters/gspbox/filters/gsp_jtv_filter_array.m
- supplementary-materials/BernNet-master/LearningFilters/gspbox/filters/gsp_filter_inverse.m
- supplementary-materials/BernNet-master/LearningFilters/gspbox/filters/gsp_jtv_design_meyer.m
- supplementary-materials/BernNet-master/LearningFilters/gspbox/filters/gsp_design_heat.m
- supplementary-materials/BernNet-master/LearningFilters/gspbox/filters/gsp_design_half_cosine.m
- supplementary-materials/BernNet-master/LearningFilters/gspbox/filters/gsp_jtv_design_can_dual.m
- supplementary-materials/BernNet-master/LearningFilters/gspbox/filters/gsp_design_can_dual.m
- supplementary-materials/BernNet-master/LearningFilters/gspbox/filters/gsp_jtv_filter_inverse.m
- supplementary-materials/BernNet-master/LearningFilters/gspbox/filters/gsp_vec2mat.m
- supplementary-materials/BernNet-master/LearningFilters/gspbox/filters/gsp_mat2vec.m
- supplementary-materials/BernNet-master/LearningFilters/gspbox/filters/gsp_design_simoncelli.m
- supplementary-materials/BernNet-master/LearningFilters/gspbox/filters/Contents.m
- supplementary-materials/BernNet-master/LearningFilters/gspbox/filters/gsp_design_simple_tf.m
- supplementary-materials/BernNet-master/LearningFilters/gspbox/filters/gsp_tighten_filter.m
- supplementary-materials/BernNet-master/LearningFilters/gspbox/filters/gsp_jtv_filter_synthesis.m
- supplementary-materials/BernNet-master/LearningFilters/gspbox/filters/gsp_filter.m
- supplementary-materials/BernNet-master/LearningFilters/gspbox/filters/gsp_wlog_scales.m
- supplementary-materials/BernNet-master/LearningFilters/gspbox/filters/gsp_gabor_filterbank.m
- supplementary-materials/BernNet-master/LearningFilters/gspbox/filters/utils/
- supplementary-materials/BernNet-master/LearningFilters/gspbox/filters/gsp_jtv_design_dgw.m
- supplementary-materials/BernNet-master/LearningFilters/gspbox/filters/gsp_design_mexican_hat.m
- supplementary-materials/BernNet-master/LearningFilters/gspbox/filters/gsp_filterbank_bounds.m
- supplementary-materials/BernNet-master/LearningFilters/gspbox/filters/gsp_jtv_evaluate_can_dual.m
- supplementary-materials/BernNet-master/LearningFilters/gspbox/filters/gsp_design_itersine.m
- supplementary-materials/BernNet-master/LearningFilters/gspbox/filters/gsp_warp_filter.m
- supplementary-materials/BernNet-master/LearningFilters/gspbox/filters/gsp_design_expwin.m
- supplementary-materials/BernNet-master/LearningFilters/gspbox/filters/gsp_test_duality.m
- supplementary-materials/BernNet-master/LearningFilters/gspbox/filters/gsp_design_meyer.m
- supplementary-materials/BernNet-master/LearningFilters/gspbox/filters/gsp_filter_analysis.m
- supplementary-materials/BernNet-master/LearningFilters/gspbox/filters/gsp_jtv_compute_frame.m
- supplementary-materials/BernNet-master/LearningFilters/gspbox/filters/gsp_jtv_filter_analysis.m
- supplementary-materials/BernNet-master/LearningFilters/gspbox/filters/gsp_filter_evaluate.m
- supplementary-materials/BernNet-master/LearningFilters/gspbox/filters/gsp_design_regular.m
- supplementary-materials/BernNet-master/LearningFilters/gspbox/filters/gsp_jtv_filter_evaluate.m
- supplementary-materials/BernNet-master/LearningFilters/gspbox/filters/gsp_filterbank_matrix.m
- supplementary-materials/BernNet-master/LearningFilters/gspbox/filters/gsp_design_smooth_indicator.m
- supplementary-materials/BernNet-master/LearningFilters/gspbox/filters/gsp_approx_filter.m
- supplementary-materials/BernNet-master/LearningFilters/gspbox/filters/gsp_design_papadakis.m
- supplementary-materials/BernNet-master/LearningFilters/gspbox/filters/gsp_test_duality_coefficient.m
- supplementary-materials/BernNet-master/LearningFilters/gspbox/filters/gsp_multiply_filters.m
- supplementary-materials/BernNet-master/LearningFilters/gspbox/filters/gsp_evaluate_can_dual.m
- supplementary-materials/BernNet-master/LearningFilters/gspbox/filters/gsp_jtv_design_damped_wave.m
- supplementary-materials/BernNet-master/LearningFilters/gspbox/filters/gsp_jtv_design_wave.m
- supplementary-materials/BernNet-master/LearningFilters/gspbox/filters/gsp_design_abspline.m
- supplementary-materials/BernNet-master/LearningFilters/gspbox/filters/gsp_jtv_design_diffusion.m
- supplementary-materials/BernNet-master/LearningFilters/gspbox/filters/gsp_design_warped_translates.m
- supplementary-materials/BernNet-master/LearningFilters/gspbox/filters/gsp_filter_synthesis.m
- supplementary-materials/BernNet-master/LearningFilters/gspbox/operators/gsp_grad.m
- supplementary-materials/BernNet-master/LearningFilters/gspbox/operators/gsp_localize.m
- supplementary-materials/BernNet-master/LearningFilters/gspbox/operators/gsp_gft.m
- supplementary-materials/BernNet-master/LearningFilters/gspbox/operators/Contents.m
- supplementary-materials/BernNet-master/LearningFilters/gspbox/operators/gsp_grad_mat.m
- supplementary-materials/BernNet-master/LearningFilters/gspbox/operators/gsp_gwft_frame_matrix.m
- supplementary-materials/BernNet-master/LearningFilters/gspbox/operators/gsp_pyramid_cell2coeff.m
- supplementary-materials/BernNet-master/LearningFilters/gspbox/operators/gsp_graph_multiresolution.m
- supplementary-materials/BernNet-master/LearningFilters/gspbox/operators/gsp_ijft.m
- supplementary-materials/BernNet-master/LearningFilters/gspbox/operators/gsp_tft.m
- supplementary-materials/BernNet-master/LearningFilters/gspbox/operators/gsp_gwft.m
- supplementary-materials/BernNet-master/LearningFilters/gspbox/operators/gsp_pyramid_synthesis_single.m
- supplementary-materials/BernNet-master/LearningFilters/gspbox/operators/gsp_igft.m
- supplementary-materials/BernNet-master/LearningFilters/gspbox/operators/gsp_kron_reduce.m
- supplementary-materials/BernNet-master/LearningFilters/gspbox/operators/gsp_kron_reduction.m
- supplementary-materials/BernNet-master/LearningFilters/gspbox/operators/gsp_itft.m
- supplementary-materials/BernNet-master/LearningFilters/gspbox/operators/gsp_pyramid_synthesis.m
- supplementary-materials/BernNet-master/LearningFilters/gspbox/operators/gsp_div.m
- supplementary-materials/BernNet-master/LearningFilters/gspbox/operators/gsp_pyramid_analysis.m
- supplementary-materials/BernNet-master/LearningFilters/gspbox/operators/gsp_jft.m
- supplementary-materials/BernNet-master/LearningFilters/gspbox/operators/gsp_modulate.m
- supplementary-materials/BernNet-master/LearningFilters/gspbox/operators/gsp_ngwft.m
- supplementary-materials/BernNet-master/LearningFilters/gspbox/operators/gsp_ngwft_frame_matrix.m
- supplementary-materials/BernNet-master/LearningFilters/gspbox/operators/gsp_pyramid_analysis_single.m
- supplementary-materials/BernNet-master/LearningFilters/gspbox/operators/gsp_interpolate.m
- supplementary-materials/BernNet-master/LearningFilters/gspbox/operators/gsp_jtwgft.m
- supplementary-materials/BernNet-master/LearningFilters/gspbox/sgwt_require/sgwt_kernel_abspline5.m
- supplementary-materials/BernNet-master/LearningFilters/gspbox/sgwt_require/sgwt_cheby_square.m
- supplementary-materials/BernNet-master/LearningFilters/gspbox/sgwt_require/create_synthetic_dataset.m
- supplementary-materials/BernNet-master/LearningFilters/gspbox/sgwt_require/sgwt_kernel_abspline3.m
- supplementary-materials/BernNet-master/LearningFilters/gspbox/sgwt_require/sgwt_kernel_simple_tf.m
- supplementary-materials/BernNet-master/LearningFilters/gspbox/graph_ml/gsp_knn_classify_graph.m
- supplementary-materials/BernNet-master/LearningFilters/gspbox/graph_ml/gsp_regression_Lx_l1.m
- supplementary-materials/BernNet-master/LearningFilters/gspbox/graph_ml/gsp_gpcatv_2g.m
- supplementary-materials/BernNet-master/LearningFilters/gspbox/graph_ml/gsp_ml_rls.m
- supplementary-materials/BernNet-master/LearningFilters/gspbox/graph_ml/gsp_regression_tik.m
- supplementary-materials/BernNet-master/LearningFilters/gspbox/graph_ml/gsp_classification_tv.m
- supplementary-materials/BernNet-master/LearningFilters/gspbox/graph_ml/gsp_ml_rls_tik.m
- supplementary-materials/BernNet-master/LearningFilters/gspbox/graph_ml/gsp_frpcaog_2g.m
- supplementary-materials/BernNet-master/LearningFilters/gspbox/graph_ml/gsp_classification_tik.m
- supplementary-materials/BernNet-master/LearningFilters/gspbox/graph_ml/gsp_rkhs_evaluate.m
- supplementary-materials/BernNet-master/LearningFilters/gspbox/graph_ml/.gitignore
- supplementary-materials/BernNet-master/LearningFilters/gspbox/graph_ml/gsp_matrix2label.m
- supplementary-materials/BernNet-master/LearningFilters/gspbox/graph_ml/gsp_classification_tv_new.m
- supplementary-materials/BernNet-master/LearningFilters/gspbox/graph_ml/gsp_regression_tv.m
- supplementary-materials/BernNet-master/LearningFilters/gspbox/graph_ml/gsp_frpcaog_1g.m
- supplementary-materials/BernNet-master/LearningFilters/gspbox/graph_ml/gsp_frkhs.m
- supplementary-materials/BernNet-master/LearningFilters/gspbox/graph_ml/gsp_classification_knn.m
- supplementary-materials/BernNet-master/LearningFilters/gspbox/graph_ml/gsp_classification_matrix.m
- supplementary-materials/BernNet-master/LearningFilters/gspbox/graph_ml/gsp_ml_rls_tv.m
- supplementary-materials/BernNet-master/LearningFilters/gspbox/graph_ml/gsp_regression_knn.m
- supplementary-materials/BernNet-master/LearningFilters/gspbox/embedding/gsp_weight2distance.m
- supplementary-materials/BernNet-master/LearningFilters/gspbox/embedding/gsp_eigenspace_estimation.m
- supplementary-materials/BernNet-master/LearningFilters/gspbox/embedding/gsp_isomap.m
- supplementary-materials/BernNet-master/LearningFilters/gspbox/embedding/Contents.m
- supplementary-materials/BernNet-master/LearningFilters/gspbox/embedding/gsp_compute_coordinates.m
- supplementary-materials/BernNet-master/LearningFilters/gspbox/embedding/gsp_lle.m
- supplementary-materials/BernNet-master/LearningFilters/gspbox/embedding/gsp_laplacian_eigenmaps.m
- supplementary-materials/BernNet-master/LearningFilters/gspbox/learn_graph/Contents.m
- supplementary-materials/BernNet-master/LearningFilters/gspbox/learn_graph/gsp_learn_graph_log_degrees.m
- supplementary-materials/BernNet-master/LearningFilters/gspbox/learn_graph/gsp_learn_graph_l2_degrees.m
- supplementary-materials/BernNet-master/LearningFilters/gspbox/learn_graph/gsp_learn_tcer.m
- supplementary-materials/BernNet-master/LearningFilters/gspbox/learn_graph/gsp_learn_graph_l2_degrees_mine.m
- supplementary-materials/BernNet-master/LearningFilters/gspbox/learn_graph/gsp_demo_learn_graph_parameters.m
- supplementary-materials/BernNet-master/LearningFilters/gspbox/utils/gsp_cheby_coeff.m
- supplementary-materials/BernNet-master/LearningFilters/gspbox/utils/gsp_cfa.m
- supplementary-materials/BernNet-master/LearningFilters/gspbox/utils/gsp_reset_seed.m
- supplementary-materials/BernNet-master/LearningFilters/gspbox/utils/gsp_laplacian.m
- supplementary-materials/BernNet-master/LearningFilters/gspbox/utils/gsp_jtv_fa.m
- supplementary-materials/BernNet-master/LearningFilters/gspbox/utils/gsp_norm_tig.m
- supplementary-materials/BernNet-master/LearningFilters/gspbox/utils/gsp_norm_l1_filterbank.m
- supplementary-materials/BernNet-master/LearningFilters/gspbox/utils/gsp_isdirected.m
- supplementary-materials/BernNet-master/LearningFilters/gspbox/utils/gsp_delta.m
- supplementary-materials/BernNet-master/LearningFilters/gspbox/utils/gsp_compute_theta_bounds.m
- supplementary-materials/BernNet-master/LearningFilters/gspbox/utils/gsp_ddf2dcdf.m
- supplementary-materials/BernNet-master/LearningFilters/gspbox/utils/gsp_distanz.m
- supplementary-materials/BernNet-master/LearningFilters/gspbox/utils/gsp_sort_nodes.m
- supplementary-materials/BernNet-master/LearningFilters/gspbox/utils/gsp_decompose_asymmatrix.m
- supplementary-materials/BernNet-master/LearningFilters/gspbox/utils/gsp_smooth_downstep.m
- supplementary-materials/BernNet-master/LearningFilters/gspbox/utils/gsp_jtv_ta.m
- supplementary-materials/BernNet-master/LearningFilters/gspbox/utils/Contents.m
- supplementary-materials/BernNet-master/LearningFilters/gspbox/utils/gsp_adj2vec.m
- supplementary-materials/BernNet-master/LearningFilters/gspbox/utils/gsp_smooth_step.m
- supplementary-materials/BernNet-master/LearningFilters/gspbox/utils/gsp_check_filtertype.m
- supplementary-materials/BernNet-master/LearningFilters/gspbox/utils/gsp_vec2adj.m
- supplementary-materials/BernNet-master/LearningFilters/gspbox/utils/gsp_rmse_mv.m
- supplementary-materials/BernNet-master/LearningFilters/gspbox/utils/gsp_check_connectivity_undirected.m
- supplementary-materials/BernNet-master/LearningFilters/gspbox/utils/utils/
- supplementary-materials/BernNet-master/LearningFilters/gspbox/utils/gsp_cartesian.m
- supplementary-materials/BernNet-master/LearningFilters/gspbox/utils/gsp_lanczos_op.m
- supplementary-materials/BernNet-master/LearningFilters/gspbox/utils/gsp_strong.m
- supplementary-materials/BernNet-master/LearningFilters/gspbox/utils/gsp_compute_graph_learning_theta.m
- supplementary-materials/BernNet-master/LearningFilters/gspbox/utils/gsp_incidence.m
- supplementary-materials/BernNet-master/LearningFilters/gspbox/utils/gsp_jtv_cheby_op.m
- supplementary-materials/BernNet-master/LearningFilters/gspbox/utils/gsp_check_weights.m
- supplementary-materials/BernNet-master/LearningFilters/gspbox/utils/gsp_estimate_lmax.m
- supplementary-materials/BernNet-master/LearningFilters/gspbox/utils/gsp_jtv_delta.m
- supplementary-materials/BernNet-master/LearningFilters/gspbox/utils/gsp_point2dcdf.m
- supplementary-materials/BernNet-master/LearningFilters/gspbox/utils/gsp_check_connectivity.m
- supplementary-materials/BernNet-master/LearningFilters/gspbox/utils/gsp_cheby_eval.m
[truncated: 601 more entries]
