# Supplementary material
Source: ML conference proceedings conference paper supplement (https://proceedings.neurips.cc/paper_files/paper/2021/hash/76f1cfd7754a6e4fc3281bcccb3d0902-Abstract.html)
Supplement: Supplementary file 1 [file 76f1cfd7754a6e4fc3281bcccb3d0902-Supplemental.zip › supplementary-materials/BernNet-master/LearningFilters/bernnet.sh]

python training.py --filter_type band --net BernNet
python training.py --filter_type low --net BernNet
python training.py --filter_type high --net BernNet
python training.py --filter_type rejection --net BernNet
python training.py --filter_type comb --net BernNet

# other models demo
for model in ChebNet GcnNet GatNet ARMANet GPRNet
do
    python training.py --filter_type band --net $model 
done
