# Supplementary material
Source: ML conference proceedings conference paper supplement (https://proceedings.neurips.cc/paper_files/paper/2021/hash/76f1cfd7754a6e4fc3281bcccb3d0902-Abstract.html)
Supplement: Supplementary file 1 [file 76f1cfd7754a6e4fc3281bcccb3d0902-Supplemental.zip › supplementary-materials/BernNet-master/LearningFilters/gspbox/embedding/gsp_lle.m]

function coords = gsp_lle(G, dim, param)
%GSP_LLE Local Linear Embedding
%   Usage: coords = gsp_lle(G, dim);
%          coords = gsp_lle(G, dim, param);
%
%   Input parameters
%         G          : Graph
%         dim        : Dimensionality of the embedding
%         param      : Structure of optional parameters
%
%   Output parameters
%         coords     : Coordinates of the embedding
%
%   This function uses the weight matrix of a graph G, in order to compute
%   a dim -dimensional embedding (output coordinates). The algorithm used
%   is Locally Linear Embedding (LLE). Warning, this function might not
%   work if the graph is not connected.
%
%   param is a structure with optional parameters:
%
%    param.tol    : Tolerance for the spectral gap (default 1e-6).
%    param.kernel : The kernel used to create the graph weight matrix:
%     + 'exp'        : exponential kernel (e^(frac{-d_{ij}}{sigma^2}))
%     + '1/x'        : inverse of x kernel (frac{1}{sigma+d_{ij}})
%     + '1/x^2'      : inverse of x^2 kernel (frac{1}{(sigma+d_{ij})^2})
%     + 'resistance' : Resistance distance.
%    param.k      : Max number of nearest neighbors. If not defined, the
%
%   number of neighbors varies from node to node since the algorithm
%   considers all the columns j of the weight matrix that have non
%   zero values on the line i as the neighbors of i.
%
%   References:
%     L. K. Saul and S. T. Roweis. An introduction to locally linear
%     embedding. unpublished. Available at: http://www. cs. toronto. edu/~
%     roweis/lle/publications. html, 2000.
%     
%
%   See also: gsp_update_coordinates gsp_isomap gsp_laplacian_eigenmaps
%
%   Demo: gsp_demo_graph_embedding
%
%   Url: https://epfl-lts2.github.io/gspbox-html/doc/embedding/gsp_lle.html

% Copyright (C) 2013-2016 Nathanael Perraudin, Johan Paratte, David I Shuman.
% This file is part of GSPbox version 0.7.5
%
% This program is free software: you can redistribute it and/or modify
% it under the terms of the GNU General Public License as published by
% the Free Software Foundation, either version 3 of the License, or
% (at your option) any later version.
%
% This program is distributed in the hope that it will be useful,
% but WITHOUT ANY WARRANTY; without even the implied warranty of
% MERCHANTABILITY or FITNESS FOR A PARTICULAR PURPOSE.  See the
% GNU General Public License for more details.
%
% You should have received a copy of the GNU General Public License
% along with this program.  If not, see <http://www.gnu.org/licenses/>.

% If you use this toolbox please kindly cite
%     N. Perraudin, J. Paratte, D. Shuman, V. Kalofolias, P. Vandergheynst,
%     and D. K. Hammond. GSPBOX: A toolbox for signal processing on graphs.
%     ArXiv e-prints, Aug. 2014.
% http://arxiv.org/abs/1408.5781

% Authors : Dion O. E. Tzamarias
% Date    : 20/11/2015

%% TODO Fix bug param.k
%%

if nargin<3
    param = struct;
end


if ~isfield(param,'tol'), param.tol = 1e-6; end
if ~isfield(param,'kernel'), param.kernel = 'exp'; end


% Handling default parameters

W = zeros(G.N,G.N);

% if ~isfield(param,'k')
    [D] = gsp_weight2distance(G);
    [rows, cols ] = find(D);
    idx = cell(cols(end),1);
    for jj=1:cols(end)
        idx{jj} = rows(cols==jj).';
    end
% else
%     [D,idx] = gsp_weight2distance(G, param.kernel, param.k);
% end
D = D.^2; % D contains the squared distances
for ii=1:length(D)
    
    %   C = 0.5*(repmat(sum(D(idx{ii},idx{ii}),2),1,length(idx{ii}))/length(idx{ii})...
    %       + repmat(sum(D(idx{ii},idx{ii}),2).',length(idx{ii}),1)/length(idx{ii}) ...
    %       - D(idx{ii},idx{ii}) - repmat(sum(sum(D(idx{ii},idx{ii}),1)),...
    %       length(idx{ii}),length(idx{ii}))/length(idx{ii}).^2);
    C = 0.5*(bsxfun(@plus,sum(D(idx{ii},idx{ii}),2),sum(D(...
        idx{ii},idx{ii}),1))/length(idx{ii})-bsxfun(@plus,...
        D(idx{ii},idx{ii}),sum(sum(D(idx{ii},idx{ii}),1))...
        /length(idx{ii}).^2));
    
    if abs(det(C))< param.tol  %   C is singular
        C = C + (param.tol*trace(C)) / length(idx{ii})...
            * eye(size(C));
    end
%     if abs(det(C))< param.tol*1e-3
%         warning('C is singular')
%     end
    
    W(ii,idx{ii}) = C\ones(length(idx{ii}),1);
    W(ii,:) = W(ii,:)./sum(W(ii,:));
end

M = (eye(G.N,G.N) - W)' * (eye(G.N,G.N) - W);
M = sparse(M);

% Compute first dim eigenvectors of M
options.disp = 0;
options.isreal = 1;
options.issym = 1;
% only need bottom (no_dims + 1) eigenvectors
tol = param.tol;
[coords, e] = eigs(M, dim + 1, tol, options);
e = diag(e);

if nnz(e<param.tol) > 1
    disp('Multiple zero eigenvalues')
end

[~ , ind] = sort(e, 'ascend');
coords = coords(:,ind);
coords = coords(:,2:end);
end


%   The input parameter type refers to the type of the problem:
%   * 'weight_matrix' : Solve problem using the weight matrix of the graph G
%     Use the pairwise distance equation in order to reconstruct data from
%     neighbours.
%   * 'coords'       : Slove the problem using the coordinates. This is the
%     typical LLE aproach.


% switch lower(type)
%     case 'coords'
%         for ii=1:G.N
%
%             k_near_indx = knnsearch(G.coords,G.coords(ii,:),'k',n_neighbor+1);
%             k_nearest = G.coords(k_near_indx(2:end),:);
%
%             C = (repmat(G.coords(ii,:),n_neighbor,1) - k_nearest)* ...
%                 (repmat(G.coords(ii,:),n_neighbor,1) - k_nearest)' ;
%
%             if abs(det(C))<tol  % C is not singular
%                 C = C + ((tol*trace(C))^2) / n_neighbor * eye(size(C));
%             end
%             if abs(det(C))<tol
%                 warning('C is not singular')
%             end
%
%             W(ii,k_near_indx(2:end)) = C\ones(n_neighbor,1);
%             W(ii,:) = W(ii,:)./sum(W(ii,:));
%         end
%
%     case 'weight_matrix'
