# Supplementary material
Source: ML conference proceedings conference paper supplement (https://proceedings.neurips.cc/paper_files/paper/2021/hash/76f1cfd7754a6e4fc3281bcccb3d0902-Abstract.html)
Supplement: Supplementary file 1 [file 76f1cfd7754a6e4fc3281bcccb3d0902-Supplemental.zip › supplementary-materials/BernNet-master/LearningFilters/gspbox/filters/gsp_design_simple_tf.m]

function [ g,t ] = gsp_design_simple_tf(G, Nf, param)
%GSP_DESIGN_SIMPLE_TF Design a simple tight frame filterbank
%   Usage: g =  gsp_design_simple_tf(G, Nf, param);
%               gsp_design_simple_tf(G ,Nf);
%               gsp_design_simple_tf(G);
%
%   Input parameters:
%         G             : Graph or upper bound on the Laplacian spectrum
%         Nf            : Number of filters to cover the interval [0,lmax] (default 6)
%         param         : Structure of optional parameters
%   Output parameters:
%         g             : A cell array of filters
%
%   This function returns a array of filters designed to be simple tight
%   frame wavelet filterbank.
%
%   param is an optional structure containing the following fields
%
%    param.t*: vector of scale to be used (default: log scale)
%    param.verbose*: verbosity level. 0 no log - 1 display warnings.
%     (default 1) 
%
%   This function will compute the maximum eigenvalue of the laplacian. To
%   be more efficient, you can precompute it using:
%
%       G = gsp_estimate_lmax(G);
%
%   Example:
%
%         Nf = 4;
%         G = gsp_sensor(100);
%         G = gsp_estimate_lmax(G);
%         g = gsp_design_simple_tf(G, Nf);   
%         gsp_plot_filter(G,g);  
%
%   This function is inspired by the sgwt_toolbox. 
%       
%   See also:
%
%   Url: https://epfl-lts2.github.io/gspbox-html/doc/filters/gsp_design_simple_tf.html

% Copyright (C) 2013-2016 Nathanael Perraudin, Johan Paratte, David I Shuman.
% This file is part of GSPbox version 0.7.5
%
% This program is free software: you can redistribute it and/or modify
% it under the terms of the GNU General Public License as published by
% the Free Software Foundation, either version 3 of the License, or
% (at your option) any later version.
%
% This program is distributed in the hope that it will be useful,
% but WITHOUT ANY WARRANTY; without even the implied warranty of
% MERCHANTABILITY or FITNESS FOR A PARTICULAR PURPOSE.  See the
% GNU General Public License for more details.
%
% You should have received a copy of the GNU General Public License
% along with this program.  If not, see <http://www.gnu.org/licenses/>.

% If you use this toolbox please kindly cite
%     N. Perraudin, J. Paratte, D. Shuman, V. Kalofolias, P. Vandergheynst,
%     and D. K. Hammond. GSPBOX: A toolbox for signal processing on graphs.
%     ArXiv e-prints, Aug. 2014.
% http://arxiv.org/abs/1408.5781

% Author: Nathanael Perraudin, David K. Hammond
% Date: 18 March 2014

    

if nargin < 3
    param = struct;
end

if ~isfield(param,'verbose'), param.verbose = 1; end

if isstruct(G)
    if ~isfield(G,'lmax')
        if param.verbose
            fprintf('GSP_DESIGN_SIMPLE_TF has to compute lmax \n')
        end
        G = gsp_estimate_lmax(G);
    end
   lmax = G.lmax;
else
   lmax = G;
end

if ~isfield(param,'t')
   param.t = (1/(2*lmax)) * 2.^(Nf-2:-1:0);
end


if param.verbose
    if length(param.t) ~= Nf - 1
       warning(['GSP_KERNEL_SIMPLE_TF: You have specified ',...
           'more scales than Number of filter -1']);
    end
end

t = param.t;
g = cell(Nf,1);


g{1}= @(x) sgwt_kernel_simple_tf(t(1)*x,'sf');
for j=1:Nf-1
    g{j+1}= @(x) sgwt_kernel_simple_tf(t(j)*x,'wavelet');
end


end
