# Supplementary material
Source: ML conference proceedings conference paper supplement (https://proceedings.neurips.cc/paper_files/paper/2021/hash/76f1cfd7754a6e4fc3281bcccb3d0902-Abstract.html)
Supplement: Supplementary file 1 [file 76f1cfd7754a6e4fc3281bcccb3d0902-Supplemental.zip › supplementary-materials/BernNet-master/LearningFilters/gspbox/filters/gsp_filter.m]

function out = gsp_filter(G, fi, signal, param)
%GSP_FILTER Filter function
%   Usage:  coeffs = gsp_filter(G, fi, signal);
%           coeffs = gsp_filter(G, fi, signal, param);
%
%   Input parameters:
%         G         : Graph structure.
%         fi        : Spectral filter.
%         s         : Graph signal to filters
%         param     : Optional parameters
%   Output parameters:
%         c         : Filtered signal
%
%   This function is a shortcut to the function GSP_FILTER_ANALYSIS.
%   Please use the documentation of GSP_FILTER_ANALYSIS
%   
%
%   Url: https://epfl-lts2.github.io/gspbox-html/doc/filters/gsp_filter.html

% Copyright (C) 2013-2016 Nathanael Perraudin, Johan Paratte, David I Shuman.
% This file is part of GSPbox version 0.7.5
%
% This program is free software: you can redistribute it and/or modify
% it under the terms of the GNU General Public License as published by
% the Free Software Foundation, either version 3 of the License, or
% (at your option) any later version.
%
% This program is distributed in the hope that it will be useful,
% but WITHOUT ANY WARRANTY; without even the implied warranty of
% MERCHANTABILITY or FITNESS FOR A PARTICULAR PURPOSE.  See the
% GNU General Public License for more details.
%
% You should have received a copy of the GNU General Public License
% along with this program.  If not, see <http://www.gnu.org/licenses/>.

% If you use this toolbox please kindly cite
%     N. Perraudin, J. Paratte, D. Shuman, V. Kalofolias, P. Vandergheynst,
%     and D. K. Hammond. GSPBOX: A toolbox for signal processing on graphs.
%     ArXiv e-prints, Aug. 2014.
% http://arxiv.org/abs/1408.5781

if nargin<4
    param = struct;
end

    out = gsp_filter_analysis(G, fi, signal, param);
end
