# Supplementary material
Source: ML conference proceedings conference paper supplement (https://proceedings.neurips.cc/paper_files/paper/2021/hash/76f1cfd7754a6e4fc3281bcccb3d0902-Abstract.html)
Supplement: Supplementary file 1 [file 76f1cfd7754a6e4fc3281bcccb3d0902-Supplemental.zip › supplementary-materials/BernNet-master/LearningFilters/gspbox/filters/gsp_filter_inverse.m]

function [s] = gsp_filter_inverse(G, filter, c, param)
%GSP_FILTER_INVERSE Inverse operator of a gsp filterbank
%   Usage:  s = gsp_filter_inverse(G, filter, c);
%           s = gsp_filter_inverse(G, filter, c, param);
%
%   Input parameters:
%         G         : Graph structure.
%         filter    : Set of spectral graph filters.
%         c         : Transform coefficients
%         param     : Optional parameter
%   Output parameters:
%         signal    : sythesis signal
%
%   'gsp_filter_inverse(G,filters,c)' computes the inverse
%   operator for coefficients c, where the atoms of the transform 
%   dictionary are generalized translations of each graph spectral filter
%   to each vertex on the graph.
%
%      f = (D'*D)^(-1) * D * c 
%
%   where the columns of D are g_{i,m}=T_i g_m, and T_i is a
%   generalized translation operator applied to each filter 
%   hat{g}_m(cdot).  
%
%   Each column of c is the response of the signal to one filter.
%
%   Example:
%
%         Nf = 4;
%         G = gsp_sensor(30);
%         G = gsp_estimate_lmax(G);
%         G = gsp_estimate_lmax(G);
%         g = gsp_design_mexican_hat(G, Nf);  
%         f = rand(G.N,1);
%         f = f/norm(f);
%         ff = gsp_filter_analysis(G,g,f);
%         f2 = gsp_filter_inverse(G,g,ff);
%         norm(f-f2)     
%
%   For additional parameters, please see GSP_FILTER_SYNTHESIS
%
%   See also: gsp_filter_analysis gsp_filter_synthesis
% 
%   References:
%     D. K. Hammond, P. Vandergheynst, and R. Gribonval. Wavelets on graphs
%     via spectral graph theory. Appl. Comput. Harmon. Anal., 30(2):129--150,
%     Mar. 2011.
%     
%
%
%   Url: https://epfl-lts2.github.io/gspbox-html/doc/filters/gsp_filter_inverse.html

% Copyright (C) 2013-2016 Nathanael Perraudin, Johan Paratte, David I Shuman.
% This file is part of GSPbox version 0.7.5
%
% This program is free software: you can redistribute it and/or modify
% it under the terms of the GNU General Public License as published by
% the Free Software Foundation, either version 3 of the License, or
% (at your option) any later version.
%
% This program is distributed in the hope that it will be useful,
% but WITHOUT ANY WARRANTY; without even the implied warranty of
% MERCHANTABILITY or FITNESS FOR A PARTICULAR PURPOSE.  See the
% GNU General Public License for more details.
%
% You should have received a copy of the GNU General Public License
% along with this program.  If not, see <http://www.gnu.org/licenses/>.

% If you use this toolbox please kindly cite
%     N. Perraudin, J. Paratte, D. Shuman, V. Kalofolias, P. Vandergheynst,
%     and D. K. Hammond. GSPBOX: A toolbox for signal processing on graphs.
%     ArXiv e-prints, Aug. 2014.
% http://arxiv.org/abs/1408.5781

% Author: Nathanael Perraudin
% Testing: test_filter
% Date: 19 March 2014

if nargin<4
    param = struct;
end

dual_filter = gsp_design_can_dual(filter);

s = gsp_filter_synthesis(G,dual_filter,c,param);


end


% 
% 
% %%% TODO: add lanczos and exact computation
% warning('This function solves the problem in a very stupid way')
% 
% % Read input parameters
% if nargin < 4
%     param = struct;
% end
% 
% Nf = length(filter);
% 
% if ~isfield(param,'order'); param.order = 30; end
% if ~isfield(param,'verbose'); param.verbose = 1; end
% if ~isfield(param,'tol'); param.tol = 1e-6; end
% if ~isfield(param,'maxit'); param.maxit = 200; end
% 
% if isfield(param,'method')
%     if strcmp(param.method,'lanczos');
%         error('Not implemented yet!');
%     end
% end
% 
%  
% if ~isfield(G,'lmax');
%     G = gsp_estimate_lmax(G);
%     if param.verbose
%         warning(['GSP_FILTER_ANALYSIS: The variable lmax is not ',...
%             'available. The function will compute it for you. ',...
%             'However, if you apply many time this function, you ',...
%             'should precompute it using the function: ',...
%             'gsp_estimate_lmax']);
%     end
% end
% 
% 
% cheb_coeffs = gsp_cheby_coeff(G, filter,...
%         param.order, param.order +1);    
% 
% 
% % Compute the adjoint
% adj = gsp_filter_synthesis(G, filter, c, param);
% 
% % W^* W
% % compute P(x) = p(x)^2
% M=size(cheb_coeffs,1);
% 
% d=zeros(1+2*(M-1),1);
% for ii=1:Nf
%     d=d+sgwt_cheby_square(cheb_coeffs(:,ii))';
% end
% wstarw = @(x) gsp_cheby_op(G,d,x);
% 
% % conjugate gradients
% s=zeros(G.N,size(adj,2));
% for ii=1:size(adj,2)
%     [s(:,ii),~,~,~]=pcg(wstarw,adj(:,ii),param.tol,param.maxit);
% end
