# Supplementary material
Source: ML conference proceedings conference paper supplement (https://proceedings.neurips.cc/paper_files/paper/2021/hash/76f1cfd7754a6e4fc3281bcccb3d0902-Abstract.html)
Supplement: Supplementary file 1 [file 76f1cfd7754a6e4fc3281bcccb3d0902-Supplemental.zip › supplementary-materials/BernNet-master/LearningFilters/gspbox/filters/gsp_filterbank_bounds.m]

function [A, B] = gsp_filterbank_bounds(G,W,param)
%GSP_FILTERBANK_BOUNDS Compute approximated frame bounds for a filterbank
%   Usage: [A, B] = gsp_filterbank_bounds(G,W);
%          [A, B] = gsp_filterbank_bounds(G,W,param);
%          [A, B] = gsp_filterbank_bounds([xmin, xmax],W);
%          [A, B] = gsp_filterbank_bounds([xmin, xmax],W,param);
%
%   Input parameters
%       G   : Graph structure or interval to compute the bound
%       W   : Filterbank (cell array of inline function)
%       param: optional parameter
%   Output parameters
%       A   : Filterbank lower bound
%       B   : Filterbank Upper bound
%
%   param is a Matlab structure containing the following fields:
%
%    param.N : Number of points for the line search default (default 999)
%    param.use_eigenvalues : Use eigenvalues if possible (default 1). To
%     be used, the eigenvalues have to be computed first using
%     GSP_COMPUTE_FOURIER_BASIS.
%
%
%   Url: https://epfl-lts2.github.io/gspbox-html/doc/filters/gsp_filterbank_bounds.html

% Copyright (C) 2013-2016 Nathanael Perraudin, Johan Paratte, David I Shuman.
% This file is part of GSPbox version 0.7.5
%
% This program is free software: you can redistribute it and/or modify
% it under the terms of the GNU General Public License as published by
% the Free Software Foundation, either version 3 of the License, or
% (at your option) any later version.
%
% This program is distributed in the hope that it will be useful,
% but WITHOUT ANY WARRANTY; without even the implied warranty of
% MERCHANTABILITY or FITNESS FOR A PARTICULAR PURPOSE.  See the
% GNU General Public License for more details.
%
% You should have received a copy of the GNU General Public License
% along with this program.  If not, see <http://www.gnu.org/licenses/>.

% If you use this toolbox please kindly cite
%     N. Perraudin, J. Paratte, D. Shuman, V. Kalofolias, P. Vandergheynst,
%     and D. K. Hammond. GSPBOX: A toolbox for signal processing on graphs.
%     ArXiv e-prints, Aug. 2014.
% http://arxiv.org/abs/1408.5781

% Author: Nathanael Perraudin
% Date : 26 March 2014

if nargin < 3
    param = struct;
end

if ~isfield(param,'N'), param.N = 999; end
if ~isfield(param,'use_eigenvalues'),  param.use_eigenvalues = 1; end

if iscell(G)
    NG = numel(G);
    A = cell(NG,1);
    B = cell(NG,1);
    for ii = 1:NG
        [A{ii}, B{ii}] = gsp_filterbank_bounds(G{ii},W{ii},param);
    end
    return
end

if isstruct(G)
    if ~isfield(G,'lmax')
        G = gsp_estimate_lmax(G);
    warning(['GSP_FILTERBANK_BOUNDS: To be more efficient you should run: ',...
        'G = gsp_estimate_lmax(G); before using this proximal operator.']);
    end
    xmax = G.lmax;
    xmin = 0;
else
    xmin = G(1);
    xmax = G(2);
end
    

if param.use_eigenvalues && isstruct(G) && isfield(G,'e')
    lambda = G.e;
else
    lambda = linspace(xmin,xmax , param.N);
end

 
Nf = numel(W);


sum_filters = sum(abs(gsp_filter_evaluate(W,lambda).^2),2);
% for ii=1:Nf
%     sum_filters = sum_filters + (W{ii}(lambda)).^2;
% end

A = min(sum_filters);
B = max(sum_filters);
  
  
  
end
