# Supplementary material
Source: ML conference proceedings conference paper supplement (https://proceedings.neurips.cc/paper_files/paper/2021/hash/76f1cfd7754a6e4fc3281bcccb3d0902-Abstract.html)
Supplement: Supplementary file 1 [file 76f1cfd7754a6e4fc3281bcccb3d0902-Supplemental.zip › supplementary-materials/BernNet-master/LearningFilters/gspbox/graph_ml/gsp_classification_tv.m]

function sol = gsp_classification_tv(G ,M, y , tau, param )
%GSP_CLASSIFICATION_TV Classification using graph and Tikonow
%   Usage: sol = gsp_classification_tv(G ,M, y );
%          sol = gsp_classification_tv(G ,M, y , tau );
%          sol = gsp_classification_tv(G ,M, y , tau, param );
%
%   Input parameters:
%       G   : Graph
%       M   : Mask (to determine with label is known)
%       y   : label (total size of the problem)
%       tau : regularization parameter (weight for tv) (default 0)
%       param : optional structure of parameters
%
%
%   Output parameters:
%       sol : Solution of the problem
%
%   This function solve the following problem
%
%      argmin_x  || M x - B ||_2^2 + tau || x ||_{G TV}
%
%   where B is a matrix create using the function GSP_CLASSIFICATION_MATRIX  
%
%   If tau is set to zero, then the following problem is solved:
%
%       argmin_x   || x ||_{G TV}    s. t.  M x - B = 0
%   
%   Warning the class needs to be integers! (Consecutive for optimality)
%
%   This function uses the UNLocBoX.
%
%   See also: gsp_regression_tv gsp_classification_tik
%
%   Url: https://epfl-lts2.github.io/gspbox-html/doc/graph_ml/gsp_classification_tv.html

% Copyright (C) 2013-2016 Nathanael Perraudin, Johan Paratte, David I Shuman.
% This file is part of GSPbox version 0.7.5
%
% This program is free software: you can redistribute it and/or modify
% it under the terms of the GNU General Public License as published by
% the Free Software Foundation, either version 3 of the License, or
% (at your option) any later version.
%
% This program is distributed in the hope that it will be useful,
% but WITHOUT ANY WARRANTY; without even the implied warranty of
% MERCHANTABILITY or FITNESS FOR A PARTICULAR PURPOSE.  See the
% GNU General Public License for more details.
%
% You should have received a copy of the GNU General Public License
% along with this program.  If not, see <http://www.gnu.org/licenses/>.

% If you use this toolbox please kindly cite
%     N. Perraudin, J. Paratte, D. Shuman, V. Kalofolias, P. Vandergheynst,
%     and D. K. Hammond. GSPBOX: A toolbox for signal processing on graphs.
%     ArXiv e-prints, Aug. 2014.
% http://arxiv.org/abs/1408.5781

% Author: Nathanael Perraudin
% Date  : 24 July 2015


%% Optional parameters

if nargin<5
    param = struct;
end

if nargin<4
    tau = 0;
end


if ~isfield(param,'verbose'), param.verbose = 1; end

%%
B = gsp_classification_matrix(y);

soltv = gsp_regression_tv(G, M, B , tau, param );

minf = min(y);
sol = gsp_matrix2label(soltv,minf);


end
