# Supplementary material
Source: ML conference proceedings conference paper supplement (https://proceedings.neurips.cc/paper_files/paper/2021/hash/76f1cfd7754a6e4fc3281bcccb3d0902-Abstract.html)
Supplement: Supplementary file 1 [file 76f1cfd7754a6e4fc3281bcccb3d0902-Supplemental.zip › supplementary-materials/BernNet-master/LearningFilters/gspbox/graph_ml/gsp_rkhs_evaluate.m]

function [ K ] = gsp_rkhs_evaluate( k,x,y, method )
%GSP_RKHS_EVALUATE Function that evaluate a kernel
%   Usage: [ K ] = gsp_rkhs_evaluate( k,x,y );
%  
%   Input parameters:
%       k       : kernel
%       x       : points (each feature vector is a column)
%       y       : points (each feature vector is a column) (default x)
%       method  : Method used to compute the kernel (default: 'mixed')
%
%   Output parameters:
%       K       : Evaluation of the kernel
%   
%   This function evaluate the kernel k between all point of x and y.
%   
%   Those different methods are availlable:
%    'copy'    : Copy both x and y an perform one shot evaluation of the
%                 kernel
%    'loop'    : Perform a double loop to evalute the kernl
%    'mixed'   : Use a single loop and a copy (this is the default)
%
%
%   Url: https://epfl-lts2.github.io/gspbox-html/doc/graph_ml/gsp_rkhs_evaluate.html

% Copyright (C) 2013-2016 Nathanael Perraudin, Johan Paratte, David I Shuman.
% This file is part of GSPbox version 0.7.5
%
% This program is free software: you can redistribute it and/or modify
% it under the terms of the GNU General Public License as published by
% the Free Software Foundation, either version 3 of the License, or
% (at your option) any later version.
%
% This program is distributed in the hope that it will be useful,
% but WITHOUT ANY WARRANTY; without even the implied warranty of
% MERCHANTABILITY or FITNESS FOR A PARTICULAR PURPOSE.  See the
% GNU General Public License for more details.
%
% You should have received a copy of the GNU General Public License
% along with this program.  If not, see <http://www.gnu.org/licenses/>.

% If you use this toolbox please kindly cite
%     N. Perraudin, J. Paratte, D. Shuman, V. Kalofolias, P. Vandergheynst,
%     and D. K. Hammond. GSPBOX: A toolbox for signal processing on graphs.
%     ArXiv e-prints, Aug. 2014.
% http://arxiv.org/abs/1408.5781

% Author: Nathanael Perraudin
% Date  : 8 December 2014
    
if nargin < 4
    method = 'mixed';
end
    
if nargin <3
    y = x;
end

N = size(x,2);
M = size(y,2);

if iscell(k)
    K = zeros(N,M*length(k));
    for ii = 1:length(k)
        K(:,(ii-1)*M+(1:M)) = gsp_rkhs_evaluate( k{ii},x,y, method );
    end
    return
end


switch method
    case 'copy'
        K = k(repmat(x,M,1)',repmat(y,N,1));
    case 'loop'
        K = zeros(N,M);
        for ii = 1:N
            for jj = 1:M
               K(ii,jj) = k(x(:,ii),y(:,jj));
            end 
        end
    case 'mixed'
        K = zeros(N,M);
        for ii = 1:N
               K(ii,:) = k(repmat(x(:,ii),1,M),y);
        end
    otherwise
        error('GSP_RKHS_EVALUATE: Unknown method')
end


end
