# Supplementary material
Source: ML conference proceedings conference paper supplement (https://proceedings.neurips.cc/paper_files/paper/2021/hash/76f1cfd7754a6e4fc3281bcccb3d0902-Abstract.html)
Supplement: Supplementary file 1 [file 76f1cfd7754a6e4fc3281bcccb3d0902-Supplemental.zip › supplementary-materials/BernNet-master/LearningFilters/gspbox/operators/gsp_gwft_frame_matrix.m]

function [ F ] = gsp_gwft_frame_matrix(G,g,param )
%GSP_GWFT_FRAME_MATRIX Create the matrix of the GWFT frame
%   Usage:  F = gsp_fast_gwft(G, g param );
%           F = gsp_fast_gwft(G,g);
%
%   Input parameters:
%         G     : Graph
%         g     : window
%         param : Structure of optional parameter
%   Output parameters:
%         F     : Frame
%
%   This function compute the graph windowed Fourier transform frame. In
%   might require a lot of memory. we create a matrix of size N^2*N. 
%
%   param a Matlab structure containing the following fields:
% 
%      param.verbose : 0 no log, 1 print main steps, 2 print all steps.
%     By default, it is 1.
%
%   Url: https://epfl-lts2.github.io/gspbox-html/doc/operators/gsp_gwft_frame_matrix.html

% Copyright (C) 2013-2016 Nathanael Perraudin, Johan Paratte, David I Shuman.
% This file is part of GSPbox version 0.7.5
%
% This program is free software: you can redistribute it and/or modify
% it under the terms of the GNU General Public License as published by
% the Free Software Foundation, either version 3 of the License, or
% (at your option) any later version.
%
% This program is distributed in the hope that it will be useful,
% but WITHOUT ANY WARRANTY; without even the implied warranty of
% MERCHANTABILITY or FITNESS FOR A PARTICULAR PURPOSE.  See the
% GNU General Public License for more details.
%
% You should have received a copy of the GNU General Public License
% along with this program.  If not, see <http://www.gnu.org/licenses/>.

% If you use this toolbox please kindly cite
%     N. Perraudin, J. Paratte, D. Shuman, V. Kalofolias, P. Vandergheynst,
%     and D. K. Hammond. GSPBOX: A toolbox for signal processing on graphs.
%     ArXiv e-prints, Aug. 2014.
% http://arxiv.org/abs/1408.5781


%   AUTHOR : Nathanael Perraudin
%   TESTING: test_fast_gwft

% Optional input arguments
if nargin<4, param=struct; end
if ~isfield(param, 'verbose'), param.verbose=1 ; end

if param.verbose && G.N>256
    warning('Create a big matrix, you can use other methods.');
end

% Compute the translate of g
ghat=G.U'*g;
Ftrans=sqrt(G.N)*G.U*(repmat(ghat,1,G.N).*G.U');

F=gsp_repmatline(Ftrans,1,G.N) .* ...
    repmat(repmat(1./G.U(:,1),1,G.N).*G.U,1,G.N);


end
