# Supplementary material
Source: ML conference proceedings conference paper supplement (https://proceedings.neurips.cc/paper_files/paper/2021/hash/76f1cfd7754a6e4fc3281bcccb3d0902-Abstract.html)
Supplement: Supplementary file 1 [file 76f1cfd7754a6e4fc3281bcccb3d0902-Supplemental.zip › supplementary-materials/BernNet-master/LearningFilters/gspbox/operators/gsp_pyramid_analysis.m]

function [coarse_approximations,prediction_errors]=gsp_pyramid_analysis(Gs,signal,num_levels,param)
%GSP_PYRAMID_ANALYSIS Compute the graph pyramid transform coefficients 
%   Usage:  [coarse_approximations,prediction_errors]=gsp_pyramid_analysis(Gs,signal,num_levels);
%           [coarse_approximations,prediction_errors]=gsp_pyramid_analysis(Gs,signal,num_levels,param);
%
%   Input parameters:
%         Gs                      : A multiresolution sequence of graph structures, including the idx parameters tracking the subsampling pattern.
%         signal                  : Graph signal to analyze.
%         num_levels              : Number of levels in the pyramid transform.
%   Output parameters:
%         coarse_approximations   : Cell array with the coarse approximations at each level.
%         prediction_errors       : Cell array with the prediction errors at each level.
%
%   'gsp_pyramid_analysis(Gs,signal,num_levels)' computes 
%   the graph pyramid transform coefficients of a signal f.
%   
%   param is a structure containing optional arguments including
%
%    param.regularize_epsilon : Interpolation parameter.
%    param.h_filters : A cell array of graph spectral filters. If just
%     one filter is included, it is used at every level of the pyramid. 
%     Default 
%
%            h(x) = 0.5 / ( 0.5 + x)
%   
%   Please read the documentation of GSP_FILTER_ANALYSIS for other
%   optional arguments.
%
%   See also: gsp_graph_multiresolution gsp_pyramid_synthesis 
%             gsp_pyramid_cell2coeff gsp_pyramid_analysis_single
%
%   Demo: gsp_demo_pyramid
% 
%   References:
%     D. I. Shuman, M. J. Faraji, and P. Vandergheynst. A framework for
%     multiscale transforms on graphs. arXiv preprint arXiv:1308.4942, 2013.
%     
%     
%
%   Url: https://epfl-lts2.github.io/gspbox-html/doc/operators/gsp_pyramid_analysis.html

% Copyright (C) 2013-2016 Nathanael Perraudin, Johan Paratte, David I Shuman.
% This file is part of GSPbox version 0.7.5
%
% This program is free software: you can redistribute it and/or modify
% it under the terms of the GNU General Public License as published by
% the Free Software Foundation, either version 3 of the License, or
% (at your option) any later version.
%
% This program is distributed in the hope that it will be useful,
% but WITHOUT ANY WARRANTY; without even the implied warranty of
% MERCHANTABILITY or FITNESS FOR A PARTICULAR PURPOSE.  See the
% GNU General Public License for more details.
%
% You should have received a copy of the GNU General Public License
% along with this program.  If not, see <http://www.gnu.org/licenses/>.

% If you use this toolbox please kindly cite
%     N. Perraudin, J. Paratte, D. Shuman, V. Kalofolias, P. Vandergheynst,
%     and D. K. Hammond. GSPBOX: A toolbox for signal processing on graphs.
%     ArXiv e-prints, Aug. 2014.
% http://arxiv.org/abs/1408.5781

% Author: David I Shuman, Nathanael Perraudin
% Date: 26 November 2015
% Testing : test_pyramid
  
% Read input parameters and check that inputs have the correct sizes
if nargin < 4
    param = struct;
end


if length(signal) ~= Gs{1}.N
    error('The signal to analyze should have the same dimension as the first graph');
end

if num_levels >= length(Gs)
    error('Not enough graphs provided to compute that many levels of the graph Laplacian pyramid');
end

if ~isfield(param,'h_filters')
    h_filters=cell(num_levels,1);
    for ii=1:num_levels
        h_filters{ii}=@(x) .5./(.5+x);
    end
elseif length(param.h_filters)==1
    h_filters=cell(num_levels,1);
    for ii=1:num_levels
        h_filters{ii}=param.h_filters;
    end
elseif length(param.h_filters)==num_levels
    h_filters=param.h_filters;
else
    error('param.h_filters should be a cell array of length 1 or num_levels');
end
        
% Compute the pyramid transform
coarse_approximations=cell(num_levels+1,1);
coarse_approximations{1}=signal;
prediction_errors = cell(num_levels,1);

for ii=1:num_levels
    [coarse_approximations{ii+1},prediction_errors{ii}] = ...
        gsp_pyramid_analysis_single( Gs{ii}, ...
        coarse_approximations{ii}, Gs{ii+1}.mr.idx, h_filters{ii}, param);
end

end
