# Supplementary material
Source: ML conference proceedings conference paper supplement (https://proceedings.neurips.cc/paper_files/paper/2021/hash/76f1cfd7754a6e4fc3281bcccb3d0902-Abstract.html)
Supplement: Supplementary file 1 [file 76f1cfd7754a6e4fc3281bcccb3d0902-Supplemental.zip › supplementary-materials/BernNet-master/LearningFilters/gspbox/prox/Contents.m]

% GSPBOX - Proximal operators and other solvers
%
%  Gradient based proximal operators
%    gsp_prox_tv       - Prox TV on graphs
%    gsp_prox_tik      - Tikhonov proximal operator on graphs
%
%  Filterbank based proximal operators
%    gsp_proj_b2_filterbank - Projection on the B2 ball
%    gsp_prox_l2_filterbank - L2 norm proximal operator
%    gsp_prox_l1_filterbank - L1 norm proximal operator
%    gsp_proj_filterbank    - Projection onto the synthesis coefficients
%
%  Wavelet based operator
%    gsp_wavelet_dn         - Wavelets denoising
%    gsp_solve_l1           - L1 minimization (synthesis)
%    gsp_solve_l0           - L0 minimization (synthesis)
%
%  For help, bug reports, suggestions etc. please send email to
%  gspbox 'dash' support 'at' groupes 'dot' epfl 'dot' ch
%
% see also: operators
%
%   Url: https://epfl-lts2.github.io/gspbox-html/doc/prox/Contents.html

% Copyright (C) 2013-2016 Nathanael Perraudin, Johan Paratte, David I Shuman.
% This file is part of GSPbox version 0.7.5
%
% This program is free software: you can redistribute it and/or modify
% it under the terms of the GNU General Public License as published by
% the Free Software Foundation, either version 3 of the License, or
% (at your option) any later version.
%
% This program is distributed in the hope that it will be useful,
% but WITHOUT ANY WARRANTY; without even the implied warranty of
% MERCHANTABILITY or FITNESS FOR A PARTICULAR PURPOSE.  See the
% GNU General Public License for more details.
%
% You should have received a copy of the GNU General Public License
% along with this program.  If not, see <http://www.gnu.org/licenses/>.

% If you use this toolbox please kindly cite
%     N. Perraudin, J. Paratte, D. Shuman, V. Kalofolias, P. Vandergheynst,
%     and D. K. Hammond. GSPBOX: A toolbox for signal processing on graphs.
%     ArXiv e-prints, Aug. 2014.
% http://arxiv.org/abs/1408.5781

%To be done
%    gsp_wavelet_dn    - Wavelet denoising operator
