# Supplementary material
Source: ML conference proceedings conference paper supplement (https://proceedings.neurips.cc/paper_files/paper/2021/hash/76f1cfd7754a6e4fc3281bcccb3d0902-Abstract.html)
Supplement: Supplementary file 1 [file 76f1cfd7754a6e4fc3281bcccb3d0902-Supplemental.zip › supplementary-materials/BernNet-master/LearningFilters/gspbox/prox/gsp_prox_tik.m]

function [sol, info] = gsp_prox_tik(x,gamma,G,param)
%GSP_PROX_TIK Proximal tikhonov operator for graphs
%   Usage:  sol = gsp_prox_tik(x, gamma, G, param)
%           sol = gsp_prox_tik(x, gamma, G)
%           [sol, info] = gsp_prox_tik(...)
%
%   Input parameters:
%         x     : Input signal.
%         gamma : Regularization parameter.
%         G     : Graph structure
%         param : Structure of optional parameters.
%   Output parameters
%         sol   : Solution.
%         info : Structure summarizing informations at convergence
%
%   This function require the UNLocBoX to be executed.
%
%   GSP_PROX_TIK(y, gamma, param) solves:
%
%      sol = argmin_{z} 0.5*||x - z||_2^2 + gamma * || nabla x||_2^2
%
%   Note the nice following relationship
%
%        x' L x = || nabla x||_2^2
%
%   param is a Matlab structure containing the following fields:
%   
%    param.tol : is stop criterion for the loop. The algorithm stops if
%
%         (  n(t) - n(t-1) )  / n(t) < tol,
%      
%     where  n(t) = f(x)+ 0.5 X-Z_2^2 is the objective function at iteration t*
%     by default, tol=10e-4.
%
%    param.maxit : max. nb. of iterations (default: 200).
%
%    param.verbose : 0 no log, 1 a summary at convergence, 2 print main
%     steps (default: 1)
%
%    param.A : Forward operator (default: Id). This parameter allows to
%     solve the following problem
%
%        sol = argmin_{z} 0.5*||x - z||_2^2 + gamma * || nabla A x||_2^2
%
%    param.At : Adjoint operator (default: Id).
%
%    param.pcg : Use the fast PCG algorithm (default 1).
%
%    param.use_martrix : 1 use the matrix operation for the gradient.
%     This faster but requires more memory (default 1).
%
%    param.nu : bound on the norm of the operator A (default: 1), i.e.
%
%        ` ||A x||^2 <= nu * ||x||^2 
%
%
%   info is a Matlab structure containing the following fields:
%
%    info.algo : Algorithm used
%
%    info.iter : Number of iteration
%
%    info.time : Time of exectution of the function in sec.
%
%    info.final_eval : Final evaluation of the function
%
%    info.crit : Stopping critterion used 
%
%
%   See also:  gsp_prox_tv
%
%
%   Url: https://epfl-lts2.github.io/gspbox-html/doc/prox/gsp_prox_tik.html

% Copyright (C) 2013-2016 Nathanael Perraudin, Johan Paratte, David I Shuman.
% This file is part of GSPbox version 0.7.5
%
% This program is free software: you can redistribute it and/or modify
% it under the terms of the GNU General Public License as published by
% the Free Software Foundation, either version 3 of the License, or
% (at your option) any later version.
%
% This program is distributed in the hope that it will be useful,
% but WITHOUT ANY WARRANTY; without even the implied warranty of
% MERCHANTABILITY or FITNESS FOR A PARTICULAR PURPOSE.  See the
% GNU General Public License for more details.
%
% You should have received a copy of the GNU General Public License
% along with this program.  If not, see <http://www.gnu.org/licenses/>.

% If you use this toolbox please kindly cite
%     N. Perraudin, J. Paratte, D. Shuman, V. Kalofolias, P. Vandergheynst,
%     and D. K. Hammond. GSPBOX: A toolbox for signal processing on graphs.
%     ArXiv e-prints, Aug. 2014.
% http://arxiv.org/abs/1408.5781


% Author: Nathanael Perraudin
% Date: 25 March 2014
% Testing: test_gsp_prox


% Start the time counter
t1 = tic;

if nargin < 3
    error('GSP_PROX_TIK: You need to provide a graph!');
end

if nargin < 4, param=struct; end

if ~isfield(param, 'tol'), param.tol = 10e-4; end
if ~isfield(param, 'verbose'), param.verbose = 1; end
if ~isfield(param, 'maxit'), param.maxit = 200; end
if ~isfield(param, 'nu'), param.nu = 1; end
if ~isfield(param, 'pcg'), param.pcg = 1; end
if ~isfield(param, 'use_matrix'), param.use_matrix = 1; end;
if ~isfield(param, 'order'), param.order = 30; end;


if ~isfield(G,'lmax')
    G = gsp_estimate_lmax(G);
    if param.verbose
    warning(['GSP_PROX_TV: To be more efficient you should run: ',...
        'G = gsp_estimate_lmax(G); before using this proximal operator.']);
    end
end

if ~isfield(param,'A')


    h =@(x) 1./(1+2*gamma*x);
    paramfilter.order = param.order;
    sol = gsp_filter_analysis(G,h,x,paramfilter);

    obj = sum(gsp_norm_tik(G,sol)) + 0.5*norm(x-sol)^2;

    if param.verbose
        fprintf(['  GSP_Prox_tik: 0.5*||x - z||_2^2 +', ...
                ' gamma * || nabla x||_2^2 = %e\n'], obj);
    end
    
    if isa(x,'single')
        sol = single(sol); 
    end
    
    info.algo=mfilename;
    info.iter=1;
    info.final_eval = obj;
    info.crit='--';
    info.time=toc(t1);
else

    if ~isfield(param,'At')
        error('GSP_PROX_TIK: Please provide param.At')
    end
    

    if ~isfield(G,'v_in')
        G = gsp_adj2vec(G);
        warning(['GSP_PROX_TV: To be more efficient you should run: ',...
            'G = gsp_adj2vec(G); before using this proximal operator.']);
    end

    param_l2.tight = 0;
    param_l2.maxit = param.maxit;
    param_l2.tol = param.tol;
    param_l2.nu = 2*G.lmax*param.nu;

    if param.use_matrix
        D = gsp_grad_mat(G);
        param_l2.A = @(x) D*param.A(x);
        param_l2.At = @(x) param.At(D'*x);
    else
        param_l2.A = @(x) gsp_grad(G,param.A(x));
        param_l2.At = @(x) param.At(gsp_div(G,x));
    end
    param_l2.verbose = param.verbose;
    param_l2.pcg = param.pcg;


    [sol,info] = prox_l2(x,gamma,param_l2);
    
    info.algo=mfilename;
 

end


end
