# Supplementary material
Source: ML conference proceedings conference paper supplement (https://proceedings.neurips.cc/paper_files/paper/2021/hash/76f1cfd7754a6e4fc3281bcccb3d0902-Abstract.html)
Supplement: Supplementary file 1 [file 76f1cfd7754a6e4fc3281bcccb3d0902-Supplemental.zip › supplementary-materials/BernNet-master/LearningFilters/gspbox/prox/gsp_wavelet_dn.m]

function [sol, info] = gsp_wavelet_dn(G, w, x, lambda, param)
%GSP_WAVELET_DN Wavelet denoising
%   Usage:  sol = gsp_wavelet_dn(G, w, x, lambda, param)
%           sol = gsp_wavelet_dn(G, w, x, lambda)
%           [sol, info] = gsp_wavelet_dn(...)
%
%   Input parameters:
%         G     : Graph structure
%         w     : Wavelet filterbank
%         x     : Signal to be denoised
%         lambda: Regularization parameter
%         param : Structure of optional parameters.
%   Output parameters
%         sol   : Solution.
%         info : Structure summarizing informations at convergence
%
%   This function will denoise a signal by solving the following convex
%   promblem:
%
%      sol = argmin_{z} || W^* z - x' ||_2^2 + lambda * ||z||_1
%
%   Where W is the frame associated to the filterbank w, x' a part of
%   the signal to be denoised and z the wavelet coefficient. 
%
%   x' consists of the high frequency part of x. It is obtained by
%   setting down to zero the low pass filter of the filerbank w.
%
%   This function require the UNLocBoX to be executed. You can download it
%   at http://unlcobox.sourceforge.net
%
%   param is a Matlab structure containing the following fields:
%   
%    param.tol : is stop criterion for the loop. The algorithm stops if
%
%         (  n(t) - n(t-1) )  / n(t) < tol,
%      
%     where  n(t) = f(x)+ 0.5 X-Z_2^2 is the objective function at iteration t*
%     by default, tol=10e-4.
%
%    param.maxit : max. nb. of iterations (default: 200).
%
%    param.tight : 1 W^ are both tight frame or 0 if not
%     (default = 0) 
%
%    param.verbose : 0 no log, 1 a summary at convergence, 2 print main
%     steps (default: 1)
%
%    param.method : Solver to be used ('FISTA', 'ISTA', 'DG') By default
%     it is 'FISTA'. ('DG' is Douglas Rachford) 
%
%    param.gamma : stepsize for the 'DG' algorithm
%
%   info is a Matlab structure containing the following fields:
%
%    info.algo : Algorithm used
%
%    info.iter : Number of iteration
%
%    info.time : Time of exectution of the function in sec.
%
%    info.final_eval : Final evaluation of the function
%
%    info.crit : Stopping critterion used 
%
%   Demo: gsp_demo_wavelet_dn
%
%   See also: gsp_prox_tv gsp_solve_l1 gsp_solve_l0
%
%
%   Url: https://epfl-lts2.github.io/gspbox-html/doc/prox/gsp_wavelet_dn.html

% Copyright (C) 2013-2016 Nathanael Perraudin, Johan Paratte, David I Shuman.
% This file is part of GSPbox version 0.7.5
%
% This program is free software: you can redistribute it and/or modify
% it under the terms of the GNU General Public License as published by
% the Free Software Foundation, either version 3 of the License, or
% (at your option) any later version.
%
% This program is distributed in the hope that it will be useful,
% but WITHOUT ANY WARRANTY; without even the implied warranty of
% MERCHANTABILITY or FITNESS FOR A PARTICULAR PURPOSE.  See the
% GNU General Public License for more details.
%
% You should have received a copy of the GNU General Public License
% along with this program.  If not, see <http://www.gnu.org/licenses/>.

% If you use this toolbox please kindly cite
%     N. Perraudin, J. Paratte, D. Shuman, V. Kalofolias, P. Vandergheynst,
%     and D. K. Hammond. GSPBOX: A toolbox for signal processing on graphs.
%     ArXiv e-prints, Aug. 2014.
% http://arxiv.org/abs/1408.5781

% Author: Nathanael Perraudin
% Date: 25 March 2014
% Testing: 


if nargin<5
    param = struct;
end

if ~isfield(param, 'verbose'), param.verbose = 2; end
if ~isfield(param, 'tight'), param.tight = 0; end
if ~isfield(param, 'tol'), param.tol = 1e-3; end
if ~isfield(param, 'maxit'), param.maxit = 200; end
if ~isfield(param, 'method'), param.method = 'FISTA'; end
if ~isfield(param, 'gamma'), param.gamma = 1; end
if ~isfield(param, 'normalize'), param.normalize = 0; end

if param.normalize
    ntig = gsp_norm_tig(G,w(2:end));
    ntig = gsp_mat2vec(ntig);
else
    ntig = 1;
end

param_solver.maxit = param.maxit;
param_solver.verbose = param.verbose;
param_solver.tol = param.tol;

% % First method to handle low frequencies
% N = G.N;
% % Remove the low frequency part
% % 1) Analysis
% y_noise_c = gsp_filter_analysis(G,w,x);
% % % 2) Save low frequencies
% % y_noise_c_bf = zeros(size(y_noise_c));
% % y_noise_c_bf(1:N) = y_noise_c(1:N);
% % 3) Set low frequencies to 0
% y_noise_c(1:N) = 0;
% % 4) Inverse to find the signal without low frequencies
% y_noise_2 = gsp_filter_inverse(G,w,y_noise_c);
% y_noise_bf = x - y_noise_2;


% Remove the low frequency part
lf = gsp_design_expwin(G,0.3);
% 1) Analysis
y_noise_bf = gsp_filter_analysis(G,lf,x);
% 2) Save low frequencies
y_noise_2 = x-y_noise_bf;

% Sparsity of the coefficients -- prox l1
param_l1.verbose = param.verbose -1;
fc1.prox = @(x,T) prox_l1(x,T*lambda,param_l1);
fc1.eval = @(x) lambda*norm(x(:),1);
% Sparsity on the coefficients side -- prox l2
[~, B] = gsp_filterbank_bounds(G,w);

param_l2f.verbose = param.verbose - 1;
param_l2f.y = y_noise_2;
param_l2f.nu = 1/(2*B^2);
param_l2f.tight = param.tight;
param_l2f.ntig = ntig;
Wh = w(2:end); % drop the low pass filter
fl2.prox = @(x,T) gsp_prox_l2_filterbank(x, T, G, Wh, param_l2f);
fl2.eval = @(x) gsp_norm_l2_filterbank(G,Wh,x,param_l2f);
Wop = @(x) gsp_filter_analysis(G, Wh, x)./ntig;
Wtop = @(x) gsp_filter_synthesis(G, Wh, x./ntig);
fl2.grad = @(x) 2*Wop(Wtop(x)-y_noise_2);
fl2.beta = (2*B^2);

% starting point
x0 = Wop(x);

switch param.method
    case 'FISTA'
        param_solver.gamma = min(1/(2*B^2),0.5)*(min(ntig)^2);
        [denoise_y_wav2_c,info] = forward_backward(x0,fc1,fl2,param_solver);
    case 'ISTA'
        param_solver.gamma = min(1/(2*B^2),0.5)*(min(ntig)^2);
        param_solver.method = 'ISTA';
        [denoise_y_wav2_c,info] = forward_backward(x0,fc1,fl2,param_solver);
    case 'DG'
        param_solver.gamma = param.gamma;
        [denoise_y_wav2_c,info] = douglas_rachford(x0,fc1,fl2,param_solver);
    otherwise
        error('GSP_WAVELET_DN: Unknown method! ');
end


sol =Wtop(denoise_y_wav2_c)+y_noise_bf;
    
end
