# Supplementary material
Source: ML conference proceedings conference paper supplement (https://proceedings.neurips.cc/paper_files/paper/2021/hash/76f1cfd7754a6e4fc3281bcccb3d0902-Abstract.html)
Supplement: Supplementary file 1 [file 76f1cfd7754a6e4fc3281bcccb3d0902-Supplemental.zip › supplementary-materials/BernNet-master/LearningFilters/utils.py]

from torch_geometric.data import InMemoryDataset
import torch
from torch_geometric.data.data import Data
import scipy.io as sio
import numpy as np
import matplotlib.pyplot as plt
from torch_geometric.utils import to_scipy_sparse_matrix,get_laplacian,remove_self_loops
import os
from numpy.linalg import eig,eigh
import math

class TwoDGrid(InMemoryDataset):
    def __init__(self, root, transform=None, pre_transform=None):
        super(TwoDGrid, self).__init__(root, transform, pre_transform)
        self.data, self.slices = torch.load(self.processed_paths[0])

    @property
    def raw_file_names(self):
        return ["2Dgrid.mat"]

    @property
    def processed_file_names(self):
        return 'data.pt'

    def download(self):
        pass

    def process(self):
        # Read data into huge `Data` list. 
        b=self.processed_paths[0]       
        a=sio.loadmat(self.raw_paths[0]) #'subgraphcount/randomgraph.mat')
        # list of adjacency matrix
        A=a['A']
        # list of output
        F=a['F']
        F=F.astype(np.float32)
        #Y=a['Y']
        #Y=Y.astype(np.float32)
        M=a['mask']
        M=M.astype(np.float32)


        data_list = []
        E=np.where(A>0)
        edge_index=torch.Tensor(np.vstack((E[0],E[1]))).type(torch.int64)
        x=torch.tensor(F)
        #y=torch.tensor(Y)   
        m=torch.tensor(M)

        x_tmp=x[:,0:1]     
        data_list.append(Data(edge_index=edge_index, x=x,x_tmp=x_tmp,m=m))
        
            
        if self.pre_filter is not None:
            data_list = [data for data in data_list if self.pre_filter(data)]

        if self.pre_transform is not None:
            data_list = [self.pre_transform(data) for data in data_list]

        data, slices = self.collate(data_list)
        torch.save((data, slices), self.processed_paths[0])

def visualize(y):
    #y=tensor.detach().cpu().numpy()
    y=np.reshape(y,(100,100))
    plt.imshow(y.T);plt.colorbar();plt.show()

def myeign(L):
    if os.path.exists('eigenvalues.npy') and os.path.exists('eigenvectors.npy'):
        eigenvalues=np.load('eigenvalues.npy')
        eigenvectors=np.load('eigenvectors.npy')
    else:
        eigenvalues, eigenvectors=eigh(L)
        np.save('eigenvalues.npy',eigenvalues)
        np.save('eigenvectors.npy',eigenvectors)
    return eigenvalues,eigenvectors

def filtering(filter_type):
    dataset = TwoDGrid(root='data/2Dgrid', pre_transform=None)
    data=dataset[0]
    x=data.x.numpy()

    #print(data.edge_index)
    adj=to_scipy_sparse_matrix(data.edge_index).todense()
    nnodes = adj.shape[0]
    D_vec = np.sum(adj, axis=1).A1
    #print(D_vec.tolist())
    D_vec_invsqrt_corr = 1 / np.sqrt(D_vec)
    D_invsqrt_corr = np.diag(D_vec_invsqrt_corr)
    #print(D_invsqrt_corr)
    L=np.eye(nnodes)-D_invsqrt_corr @ adj @ D_invsqrt_corr
    #print(L)
    eigenvalues, eigenvectors=myeign(L)
    #print(eigenvalues[3])

    #low-pass
    if filter_type=='low':
        value_tmp=[math.exp(-10*(xxx-0)**2) for xxx in eigenvalues]

    #high-pass
    elif filter_type=='high':
        value_tmp=[1-math.exp(-10*(xxx-0)**2) for xxx in eigenvalues]
    
    #band-pass
    elif filter_type=='band':
        value_tmp=[math.exp(-10*(xxx-1)**2) for xxx in eigenvalues]
    
    #band_rejection
    elif filter_type=='rejection':
        value_tmp=[1-math.exp(-10*(xxx-1)**2) for xxx in eigenvalues]
    
    #comb
    elif filter_type=='comb':
        value_tmp=[abs(np.sin(xxx*math.pi)) for xxx in eigenvalues]

    #low_band
    elif filter_type=='low_band':
        y=[]
        for i in eigenvalues:
            if i<0.5:
                y.append(1)
            elif i <1 and i>=0.5:
                y.append(math.exp(-100*(i-0.5)**2))
            else:
                y.append(math.exp(-50*(i-1.5)**2))
        value_tmp=y

    value_tmp=np.array(value_tmp)
    value_tmp=np.diag(value_tmp)
    #print(value_tmp[5000][5000])

    y=eigenvectors@value_tmp@eigenvectors.T@x
    np.save('y_'+filter_type+'.npy',y)
    return y
    

    

    
