# Supplementary material
Source: ML conference proceedings conference paper supplement (https://proceedings.neurips.cc/paper_files/paper/2021/hash/76f1cfd7754a6e4fc3281bcccb3d0902-Abstract.html)
Supplement: Supplementary file 1 [file 76f1cfd7754a6e4fc3281bcccb3d0902-Supplemental.zip › supplementary-materials/BernNet-master/NodeClassification/bernnet.sh]

python training.py  --dataset Pubmed --Bern_lr 0.01 --dprate 0.0 --weight_decay 0.0  --net BernNet
python training.py --dataset Computers --Bern_lr 0.05 --dprate 0.6 --net BernNet
python training.py --dataset Photo --Bern_lr 0.01 --dprate 0.5 --net BernNet
python training.py  --dataset Cora --Bern_lr 0.01 --dprate 0.0 --net BernNet
python training.py  --dataset Citeseer --Bern_lr 0.01 --dprate 0.5 --net BernNet

python training.py --dataset Chameleon --lr 0.05 --Bern_lr 0.01 --dprate 0.7 --weight_decay 0.0 --net BernNet
python training.py --dataset Actor --lr 0.05 --Bern_lr 0.01 --dprate 0.9 --weight_decay 0.0 --net BernNet
python training.py --dataset Squirrel --lr 0.05 --Bern_lr 0.01 --dprate 0.6 --weight_decay 0.0 --net BernNet
python training.py --dataset Texas --lr 0.05 --Bern_lr 0.002 --dprate 0.5 --net BernNet
python training.py --dataset Cornell --lr 0.05 --Bern_lr 0.001 --dprate 0.5 --net BernNet  
