# Supplementary material
Source: ML conference proceedings conference paper supplement (https://proceedings.neurips.cc/paper_files/paper/2021/hash/76f1cfd7754a6e4fc3281bcccb3d0902-Abstract.html)
Supplement: Supplementary file 1 [file 76f1cfd7754a6e4fc3281bcccb3d0902-Supplemental.zip › supplementary-materials/BernNet-master/NodeClassification/Bernpro.py]

from typing import Optional
from torch_geometric.typing import OptTensor
import math
import torch
from torch.nn import Parameter
from torch_geometric.nn.conv import MessagePassing
from torch_geometric.utils import remove_self_loops, add_self_loops
from torch_geometric.utils import get_laplacian
from scipy.special import comb
import torch.nn.functional as F
from torch_geometric.nn.conv.gcn_conv import gcn_norm
import numpy as np


class Bern_prop(MessagePassing):
    def __init__(self, K, bias=True, **kwargs):
        super(Bern_prop, self).__init__(aggr='add', **kwargs)
        
        self.K = K
        self.temp = Parameter(torch.Tensor(self.K+1))
        self.reset_parameters()

    def reset_parameters(self):
        self.temp.data.fill_(1)

    def forward(self, x, edge_index,edge_weight=None):
        TEMP=F.relu(self.temp)

        #L=I-D^(-0.5)AD^(-0.5)
        edge_index1, norm1 = get_laplacian(edge_index, edge_weight,normalization='sym', dtype=x.dtype, num_nodes=x.size(self.node_dim))
        #2I-L
        edge_index2, norm2=add_self_loops(edge_index1,-norm1,fill_value=2.,num_nodes=x.size(self.node_dim))

        tmp=[]
        tmp.append(x)
        for i in range(self.K):
        	x=self.propagate(edge_index2,x=x,norm=norm2,size=None)
        	tmp.append(x)

        out=(comb(self.K,0)/(2**self.K))*TEMP[0]*tmp[self.K]

        for i in range(self.K):
        	x=tmp[self.K-i-1]
        	x=self.propagate(edge_index1,x=x,norm=norm1,size=None)
        	for j in range(i):
        		x=self.propagate(edge_index1,x=x,norm=norm1,size=None)

        	out=out+(comb(self.K,i+1)/(2**self.K))*TEMP[i+1]*x
        return out
    def message(self, x_j, norm):
        return norm.view(-1, 1) * x_j

    def __repr__(self):
        return '{}(K={}, temp={})'.format(self.__class__.__name__, self.K,
                                          self.temp)
