# Supplementary material
Source: ML conference proceedings conference paper supplement (https://proceedings.neurips.cc/paper_files/paper/2021/hash/76f1cfd7754a6e4fc3281bcccb3d0902-Abstract.html)
Supplement: Supplementary file 1 [file 76f1cfd7754a6e4fc3281bcccb3d0902-Supplemental.zip › supplementary-materials/BernNet-master/NodeClassification/dataset_loader.py]

import torch
import math
import pickle
import os.path as osp
import numpy as np
import torch.nn.functional as F
import torch_geometric.transforms as T
from torch_geometric.datasets import Planetoid
from torch_geometric.datasets import Coauthor
from torch_geometric.datasets import Amazon
from torch_geometric.nn import APPNP
from torch_sparse import coalesce
from torch_geometric.data import InMemoryDataset, download_url, Data
from torch_geometric.utils.undirected import is_undirected, to_undirected
from torch_geometric.io import read_npz


class dataset_heterophily(InMemoryDataset):
    def __init__(self, root='data/', name=None,
                 p2raw=None,
                 train_percent=0.01,
                 transform=None, pre_transform=None):
        if name=='actor':
            name='film'
        existing_dataset = ['chameleon', 'film', 'squirrel']
        if name not in existing_dataset:
            raise ValueError(
                f'name of hypergraph dataset must be one of: {existing_dataset}')
        else:
            self.name = name

        self._train_percent = train_percent

        if (p2raw is not None) and osp.isdir(p2raw):
            self.p2raw = p2raw
        elif p2raw is None:
            self.p2raw = None
        elif not osp.isdir(p2raw):
            raise ValueError(
                f'path to raw hypergraph dataset "{p2raw}" does not exist!')

        if not osp.isdir(root):
            os.makedirs(root)

        self.root = root

        super(dataset_heterophily, self).__init__(
            root, transform, pre_transform)

        self.data, self.slices = torch.load(self.processed_paths[0])
        self.train_percent = self.data.train_percent.item()

    @property
    def raw_dir(self):
        return osp.join(self.root, self.name, 'raw')

    @property
    def processed_dir(self):
        return osp.join(self.root, self.name, 'processed')

    @property
    def raw_file_names(self):
        file_names = [self.name]
        return file_names

    @property
    def processed_file_names(self):
        return ['data.pt']

    def download(self):
        pass

    def process(self):
        p2f = osp.join(self.raw_dir, self.name)
        with open(p2f, 'rb') as f:
            data = pickle.load(f)
        data = data if self.pre_transform is None else self.pre_transform(data)
        torch.save(self.collate([data]), self.processed_paths[0])

    def __repr__(self):
        return '{}()'.format(self.name)


class WebKB(InMemoryDataset):

    url = ('https://raw.githubusercontent.com/graphdml-uiuc-jlu/geom-gcn/'
           'master/new_data')

    def __init__(self, root, name, transform=None, pre_transform=None):
        self.name = name.lower()
        assert self.name in ['cornell', 'texas', 'washington', 'wisconsin']

        super(WebKB, self).__init__(root, transform, pre_transform)
        self.data, self.slices = torch.load(self.processed_paths[0])

    @property
    def raw_dir(self):
        return osp.join(self.root, self.name, 'raw')

    @property
    def processed_dir(self):
        return osp.join(self.root, self.name, 'processed')

    @property
    def raw_file_names(self):
        return ['out1_node_feature_label.txt', 'out1_graph_edges.txt']

    @property
    def processed_file_names(self):
        return 'data.pt'

    def download(self):
        for name in self.raw_file_names:
            download_url(f'{self.url}/{self.name}/{name}', self.raw_dir)

    def process(self):
        with open(self.raw_paths[0], 'r') as f:
            data = f.read().split('\n')[1:-1]
            x = [[float(v) for v in r.split('\t')[1].split(',')] for r in data]
            x = torch.tensor(x, dtype=torch.float)

            y = [int(r.split('\t')[2]) for r in data]
            y = torch.tensor(y, dtype=torch.long)

        with open(self.raw_paths[1], 'r') as f:
            data = f.read().split('\n')[1:-1]
            data = [[int(v) for v in r.split('\t')] for r in data]
            edge_index = torch.tensor(data, dtype=torch.long).t().contiguous()
            edge_index = to_undirected(edge_index)
            edge_index, _ = coalesce(edge_index, None, x.size(0), x.size(0))

        data = Data(x=x, edge_index=edge_index, y=y)
        data = data if self.pre_transform is None else self.pre_transform(data)
        torch.save(self.collate([data]), self.processed_paths[0])

    def __repr__(self):
        return '{}()'.format(self.name)


def DataLoader(name):
    
    name = name.lower()
    if name in ['cora', 'citeseer', 'pubmed']:
        root_path = './'
        path = osp.join(root_path, 'data', name)
        dataset = Planetoid(path, name, transform=T.NormalizeFeatures())
    elif name in ['computers', 'photo']:
        root_path = './'
        path = osp.join(root_path, 'data', name)
        dataset = Amazon(path, name, T.NormalizeFeatures())
    elif name in ['chameleon', 'actor', 'squirrel']:
        dataset = dataset_heterophily(root='./data/', name=name, transform=T.NormalizeFeatures())

    elif name in ['texas', 'cornell']:
        dataset = WebKB(root='./data/',name=name, transform=T.NormalizeFeatures())

    else:
        raise ValueError(f'dataset {name} not supported in dataloader')

    return dataset
