# Supplementary material
Source: ML conference proceedings conference paper supplement (https://proceedings.neurips.cc/paper_files/paper/2021/hash/76f1cfd7754a6e4fc3281bcccb3d0902-Abstract.html)
Supplement: Supplementary file 1 [file 76f1cfd7754a6e4fc3281bcccb3d0902-Supplemental.zip › supplementary-materials/BernNet-master/NodeClassification/utils.py]

import torch
import math
import numpy as np


def index_to_mask(index, size):
    mask = torch.zeros(size, dtype=torch.bool)
    mask[index] = 1
    return mask

def random_planetoid_splits(data, num_classes, percls_trn=20, val_lb=500, seed=12134):
    index=[i for i in range(0,data.y.shape[0])]
    train_idx=[]
    rnd_state = np.random.RandomState(seed)
    for c in range(num_classes):
        class_idx = np.where(data.y.cpu() == c)[0]
        if len(class_idx)<percls_trn:
            train_idx.extend(class_idx)
        else:
            train_idx.extend(rnd_state.choice(class_idx, percls_trn,replace=False))
    rest_index = [i for i in index if i not in train_idx]
    val_idx=rnd_state.choice(rest_index,val_lb,replace=False)
    test_idx=[i for i in rest_index if i not in val_idx]
    #print(test_idx)

    data.train_mask = index_to_mask(train_idx,size=data.num_nodes)
    data.val_mask = index_to_mask(val_idx,size=data.num_nodes)
    data.test_mask = index_to_mask(test_idx,size=data.num_nodes)
    
    return data
